# Supplementary material for: A dendrite-free Li–S battery with a cerium-doped sulfide glass–ceramic composite electrolyte
Source: Royal Society of Chemistry journal article supplement (doi:10.1039/d5qm00523j), 2025-01-01
Supplement: d5qm00523j1.pdf [file d5qm00523j1.pdf]

## Supplementary Information

Amirhossein Mirtaleb and Ruigang Wang\*

Department of Chemical Engineering and Materials Science,

Michigan State University, East Lansing, MI 48824

rwang@msu.edu

**Figure S1. Photographic Appearance of Composite Electrolyte Membranes**

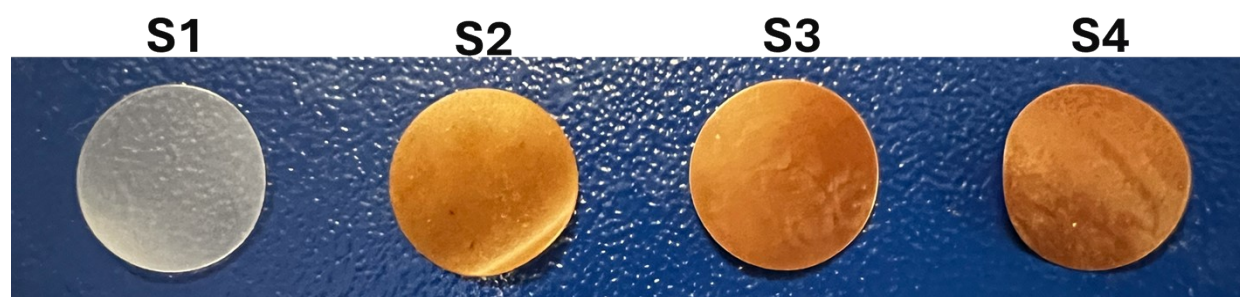

Figure S1: Photographs of PVDF–LiTFSI– $\text{Li}_7\text{P}_{2.9}\text{Ce}_{0.1}\text{S}_{11}$  composite polymer electrolyte films with increasing ceramic filler content (0, 5, 10, and 15 wt%, left to right).

**Table S1. Composite Electrolyte Composition**

The precise formulation of the PVDF–LiTFSI– $\text{Li}_7\text{P}_{2.9}\text{Ce}_{0.1}\text{S}_{11}$  composite polymer electrolytes is given in Table S1.

Table S1: Composition of PVDF–LiTFSI– $\text{Li}_7\text{P}_{2.9}\text{Ce}_{0.1}\text{S}_{11}$  composite polymer electrolyte samples with varying filler loadings, showing  $\text{Li}_7\text{P}_{2.9}\text{Ce}_{0.1}\text{S}_{11}$ , PVDF, and LiTFSI masses (mg) and total solid mass.

| Sample | Filler Content (wt%) | $\text{Li}_7\text{P}_{2.9}\text{Ce}_{0.1}\text{S}_{11}$ (mg) | PVDF (mg) | LiTFSI (mg) | Total Solids (mg) |
|--------|----------------------|--------------------------------------------------------------|-----------|-------------|-------------------|
| S1     | 0%                   | 0                                                            | 880       | 400         | 1280              |
| S2     | 5%                   | 64                                                           | 816       | 400         | 1280              |
| S3     | 10%                  | 128                                                          | 752       | 400         | 1280              |
| S4     | 15%                  | 192                                                          | 688       | 400         | 1280              |

**Figure S2. Synthesis procedures for assembling coin cells**

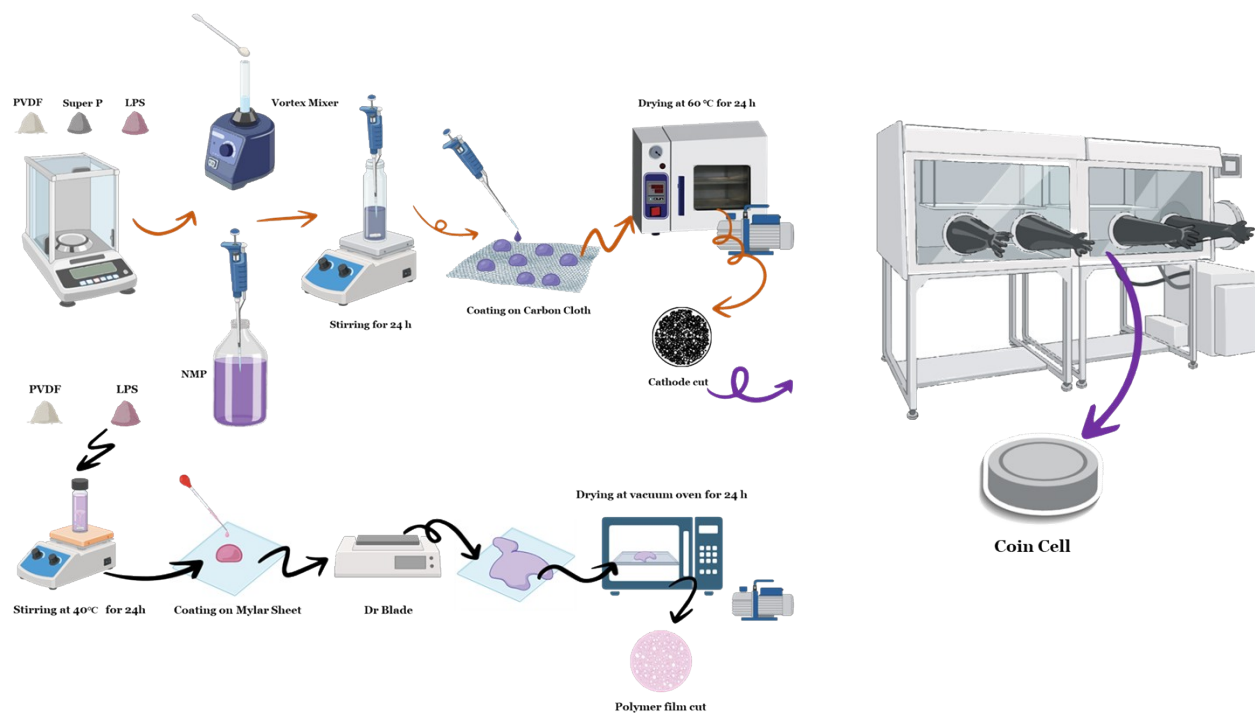

Figure S2: Schematic diagram: synthesis procedures for assembling coin cells with composite polymer electrolyte.

### Figure S3. Morphology and Elemental Distribution of the Neat Polymer Electrolyte (PE)

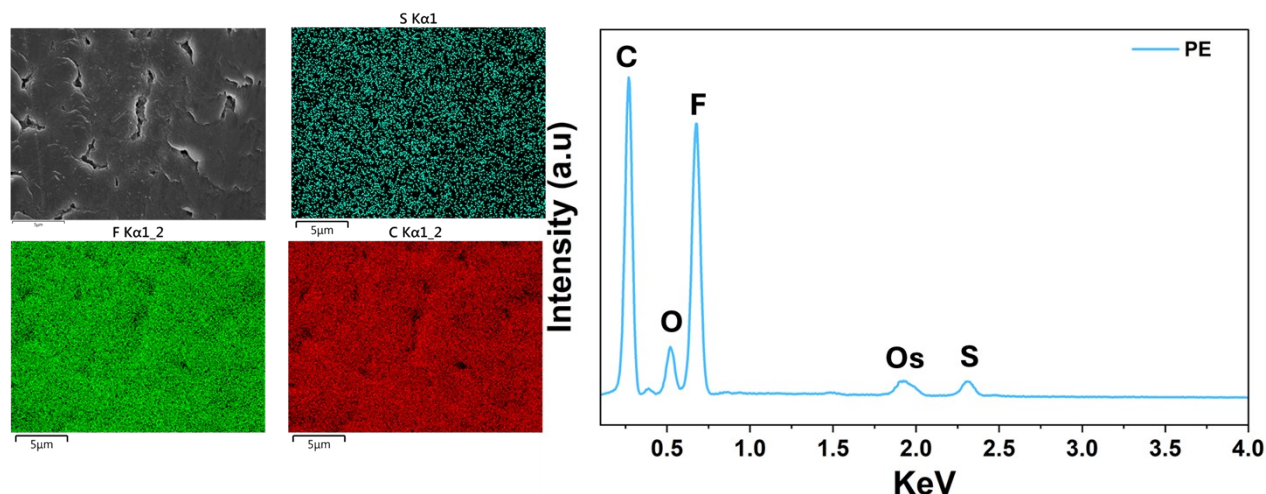

Figure S3: SEM, elemental mapping, and EDS spectrum of the neat polymer electrolyte (PE), showing uniform C, F, and O distribution with trace S and Os from PVDF-LiTFSI and osmium coating.

### Figure S4. Morphology and Elemental Distribution of the 10 wt% $\text{Li}_7\text{P}_{2.9}\text{Ce}_{0.1}\text{S}_{11}$ Composite Polymer Electrolyte (CPE)

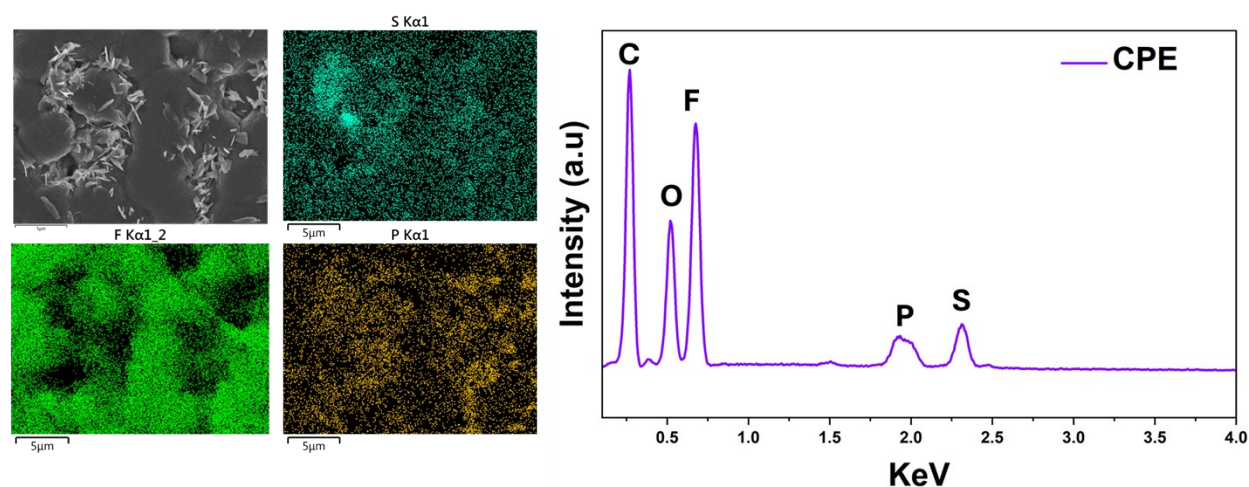

Figure S4: SEM, elemental mapping, and EDS spectrum of the CPE with 10 wt%  $\text{Li}_7\text{P}_{2.9}\text{Ce}_{0.1}\text{S}_{11}$ , showing uniformly distributed ceramic fillers and confirming the presence of C, F, O, P, and S.

## Table S2. Li<sup>+</sup> Transference Number Calculation

The Li<sup>+</sup> transference number ( $t_+$ ) was determined using the Bruce–Vincent method, which combines chronoamperometry and electrochemical impedance spectroscopy (EIS). A symmetric Li — electrolyte — Li cell was polarized under a constant DC voltage of  $\Delta V = 50$  mV, and the current response was recorded from the initial current  $I_0$  to the steady-state current  $I_{ss}$ . The interfacial plus bulk resistances before and after polarization ( $R_0$  and  $R_{ss}$ ) were extracted from Nyquist plots collected immediately before and after the DC step.

The transference number was calculated using the Bruce–Vincent equation:

$$t_+^{Li} = \frac{I_{ss}(\Delta V - I_0 R_0)}{I_0(\Delta V - I_{ss} R_{ss})}$$

The calculated values are summarized in Table S2.

Table S2: Parameters and calculated Li<sup>+</sup> transference numbers for PE and CPE cells under a 50 mV DC bias.

| <b>Electrolyte</b> | $R_0$ ( $\Omega$ ) | $R_{ss}$ ( $\Omega$ ) | $I_0$ (A)             | $I_{ss}$ (A)           | $t_+$ |
|--------------------|--------------------|-----------------------|-----------------------|------------------------|-------|
| PE (no filler)     | 80.9               | 93.0                  | $3.90 \times 10^{-4}$ | $2.295 \times 10^{-4}$ | 0.375 |
| CPE (with filler)  | 20.4               | 21.0                  | $1.16 \times 10^{-4}$ | $7.348 \times 10^{-5}$ | 0.623 |

## Table S3. Benchmarking of Electrochemical Performance in Solid-State Li–S Batteries

Table S3: Comparison of electrochemical performance of various solid-state and composite polymer electrolyte (CPE)-based Li–S battery systems.

| System               | Electrolyte Type                                                             | Ionic Conductivity<br>( $\text{S}\cdot\text{cm}^{-1}$ ) | S Loading<br>( $\text{mg}\cdot\text{cm}^{-2}$ ) | Initial Capacity<br>( $\text{mAh}\cdot\text{g}^{-1}$ ) | 1000-cycle Capacity<br>( $\text{mAh}\cdot\text{g}^{-1}$ ) | Retention<br>(%) | $t_+$   | Window (V) | Reference |
|----------------------|------------------------------------------------------------------------------|---------------------------------------------------------|-------------------------------------------------|--------------------------------------------------------|-----------------------------------------------------------|------------------|---------|------------|-----------|
| <b>This work</b>     | PVDF–LiTFSI + 10 wt% $\text{Li}_7\text{P}_{2.9}\text{Ce}_{0.1}\text{S}_{11}$ | $9.0 \times 10^{-4}$                                    | 1.0 / 5.0                                       | 1610 @ 0.2C                                            | 642 @ 1C                                                  | ~ 39             | 0.6     | ~4.5       | This work |
| Wu et al., 2020      | LLZO–PVDF–HFP                                                                | $\sim 1.2 \times 10^{-4}$                               | 2.0                                             | 1245 @ 0.2C                                            | 680 @ 300 cyc                                             | ~55              | ~0.3    | ~4.5       | [1]       |
| Yu & Manthiram, 2021 | PEO–LLZO composite                                                           | $\sim 5.0 \times 10^{-5}$                               | 2.5                                             | ~1350 @ 0.1C                                           | 700 @ 300 cyc                                             | ~52              | 0.2–0.3 | ~4.2       | [2]       |
| Liu et al., 2016     | PAN gel polymer                                                              | $1.0 \times 10^{-3}$                                    | 1.5                                             | ~1500 @ 0.1C                                           | ~800 @ 200 cyc                                            | ~53              | –       | ~4.6       | [3]       |
| Wei et al., 2023     | $\text{MoTe}_2$ @Graphene CPE                                                | $\sim 6.4 \times 10^{-4}$                               | 1.2                                             | 1583 @ 0.2C                                            | 890 @ 500 cyc                                             | ~ 56             | –       | ~4.3       | [4]       |
| Pan et al., 2022     | $\text{In}_2\text{S}_3$ -doped $\text{Li}_7\text{P}_3\text{S}_{11}$          | $3.1 \times 10^{-3}$                                    | 2.0                                             | 1492 @ 0.2C                                            | 1100 @ 200 cyc                                            | ~74              | –       | ~ 5        | [5]       |
| Zhang et al., 2016   | Garnet–PEO                                                                   | $4.2 \times 10^{-5}$                                    | 1.0                                             | 1150 @ 0.1C                                            | 600 @ 100 cyc                                             | ~52              | ~0.25   | ~4.6       | [6]       |

## References

- [1] M. Wu, D. Liu, D. Qu, Z. Xie, J. Li, J. Lei, and H. Tang. 3d coral-like llzo/pvdf composite electrolytes with enhanced ionic conductivity and mechanical flexibility for solid-state lithium batteries. *ACS Applied Materials Interfaces*, 12(47):52652–52659, 2020.
- [2] X. Yu and A. Manthiram. A review of composite polymer–ceramic electrolytes for lithium batteries. *Energy Storage Materials*, 34:282–300, 2021.
- [3] M. Liu, D. Zhou, Y.-B. He, Y. Fu, X. Qin, C. Miao, H. Du, B. Li, Q.-H. Yang, and Z. Lin. Novel gel polymer electrolyte for high-performance lithium–sulfur batteries. *Nano Energy*, 22:278–289, 2016.
- [4] Y. Wei, B. Zhao, C. Song, J. Wu, W. Wu, and L. Yao. Flexible composite polymer electrolyte based on  $\text{mote}_2/\text{graphene}$  for high-performance lithium-sulfur batteries. *Journal of Colloid and Interface Science*, 635:391–400, 2023.
- [5] H. Pan, Y. Liu, Z. Liu, X. Chen, Y. Zhang, and L. Wang. All-solid-state lithium–sulfur batteries enabled by  $\text{in}_2\text{s}_3$ -doped  $\text{li}_7\text{p}_3\text{s}_{11}$  solid electrolyte. *ACS Applied Energy Materials*, 5(11):13429–13438, 2022.
- [6] J. Zhang, N. Zhao, M. Zhang, Y. Li, P. K. Chu, X. Guo, Z. Di, X. Wang, and H. Li. Flexible and ion-conducting membrane electrolytes for solid-state lithium batteries: dispersion of garnet nanoparticles in insulating polyethylene oxide. *Nano Energy*, 28:447–454, 2016.
